1 **Cannabinoids Activate the Insulin Pathway to Modulate Mobilization**  
2 **of Cholesterol in *C. elegans***

3 **Short Title**

4 Endocannabinoids and cholesterol mobilization

5  
6 **Authors**

7 Bruno Hernandez-Craverro<sup>1</sup>, Sofia Gallino<sup>2</sup>, Jeremy Florman<sup>3</sup>, Cecilia Vranych<sup>1</sup>,  
8 Philippe Diaz<sup>4</sup>, Ana Belén Elgoyhen<sup>2</sup>, Mark J. Alkema<sup>3</sup> and Diego de Mendoza<sup>1\*</sup>

9  
10 **Affiliations**

11 <sup>1</sup>Laboratorio de Fisiología Microbiana, Instituto de Biología Molecular y Celular de  
12 Rosario (IBR), CONICET, Facultad de Ciencias Bioquímicas y Farmacéuticas,  
13 Universidad Nacional de Rosario, 2000, Rosario, Argentina.

14 <sup>2</sup>Laboratorio de Fisiología y Genética de la Audición, Instituto de Investigaciones en  
15 Ingeniería Genética y Biología Molecular "Dr. Héctor N. Torres" (INGEBI), Consejo  
16 Nacional de Investigaciones Científicas y Técnicas (CONICET), Buenos Aires,  
17 Argentina.

18 <sup>3</sup>Department of Neurobiology, University of Massachusetts Medical School, Worcester,  
19 MA, USA.

20 <sup>4</sup>Department of Biomedical and Pharmaceutical Sciences, University of Montana, 32  
21 Campus Drive, Missoula, Montana 59812, USA

22 \*Corresponding author

23 **Contact information for corresponding author**

24 Diego de Mendoza

25 Instituto de Biología Molecular y Celular de Rosario (IBR, CONICET-UNR), 2000EXF  
26 Rosario, Argentina

27 Electronic address: demendoza@ibr-conicet.gov.ar

28  
29 **Keywords**

30 *C. elegans*, endocannabinoid, genetic analysis, cholesterol, RNAi enhancer screen  
31 insulin pathway

32

33 **Abstract**

34 The nematode *Caenorhabditis elegans* requires exogenous cholesterol to survive and its  
35 depletion leads to early development arrest. Thus, tight regulation of cholesterol  
36 storage and distribution within the organism is critical. Previously, we demonstrated  
37 that the endocannabinoid (eCB) 2-arachidonoylglycerol (2-AG) plays a key role in *C.*  
38 *elegans* modulating sterol mobilization, but the mechanism is unknown. Here we show  
39 that mutations in the *ocr-2* and *osm-9* genes coding for transient receptors potential V  
40 (TRPV) ion channels, dramatically reduces the effect of 2-AG in cholesterol mobilization.  
41 Through genetic analysis combined with the rescuing of larval arrest induced by sterol  
42 starvation we found that the insulin/IGF-1 signaling (IIS) pathway and UNC-31/CAPS, a  
43 calcium-activated regulator of neural dense-core vesicles release, are essential for 2-AG-  
44 mediated stimulation of cholesterol mobilization. These findings indicate that 2-AG-  
45 dependent cholesterol trafficking requires the release of insulin peptides and signaling  
46 through the DAF-2 insulin receptor. These results suggest that 2-AG acts as an  
47 endogenous modulator of TRPV signal transduction to control intracellular sterol traffic  
48 through modulation of the IGF-1 signaling pathway.

49 **Author summary**

50 Although cannabis extracts have been used in folklore medicine for centuries, the past  
51 few years have seen an increased interest in the medicinal uses of cannabinoids, the  
52 bioactive components of the cannabis plant, for treatment of many diseases of the  
53 nervous system. However, the human body naturally produces endocannabinoids that  
54 are similar to the cannabinoids present in *Cannabis sativa*. Our goal is to understand  
55 how endocannabinoids maintain cholesterol homeostasis in animals, underscoring the  
56 importance of cholesterol balance for healthy life. Both cholesterol excess and  
57 cholesterol deficiency can have detrimental effects on health, and a myriad of regulatory  
58 processes have thus evolved to control the metabolic pathways of sterol metabolism.  
59 The nematode *C. elegans* is auxotroph for sterols, that is; contrary to mammals they  
60 cannot synthesize sterols, therefore, dietary supply is essential for survival. The aim of  
61 our study was to elucidate the mechanism by which endocannabinoids abolish larval  
62 arrest of *C. elegans* induced by cholesterol depletion. We discovered that  
63 endocannabinoids stimulate the insulin pathway, which affects development,  
64 reproduction and life span, to modulate mobilization of cholesterol in *C. elegans*. Our  
65 studies have important implications for a better understanding of human pathological  
66 conditions associated with impaired cholesterol homeostasis.

67

68

69

70

## 71 **Introduction**

72 Cholesterol is essential for a diverse range of cellular processes, including hormone  
73 signaling, fat metabolism, and membrane structure and dynamics. Dysregulation of  
74 cholesterol and lipid homeostasis can have a major impact on development and disease  
75 [1,2]. Cholesterol deficiency can result in blunted steroid hormone production, reduced  
76 serotonin levels, vitamin deficiencies, and increased mortality, whereas cholesterol  
77 excess is a risk factor for cardiovascular disease, diabetes, neurodegeneration, and  
78 inflammation [3–8]. Thus, understanding cholesterol and lipid homeostasis is critical to  
79 illuminate aspects of human health and longevity.

80 The nematode *Caenorhabditis elegans* requires exogenous cholesterol because cannot  
81 synthesize it de novo [9]. In *C. elegans*, cholesterol regulates at least two processes. First,  
82 it is required for growth and progression through larval stages, as well as for proper  
83 shedding of old cuticles during larval molting events [10]. Second, it regulates entry into  
84 a specialized diapause stage adapted for survival under harsh conditions, called the  
85 dauer larva [11]. Tight spatial and temporal regulation of uptake, storage, and transport  
86 of sterols to appropriate subcellular compartments is required for cholesterol to exert  
87 its diverse cellular functions [10].

88 Despite the pivotal role of sterols in *C. elegans* development, the regulation of  
89 cholesterol metabolism is only now beginning to be understood. Previously, it was  
90 shown that worms grown in the absence of cholesterol arrest as dauer-like larvae in the  
91 second generation [9]. The sterols that govern dauer formation are bile-acid-like  
92 hormones called dafachronic acids (DAs) [11]. Molecular mechanisms underlying their  
93 function have been intensely studied. DAs inhibit dauer formation by binding to the

94 nuclear hormone receptor DAF-12, which, in the absence of DAs, activates the dauer  
95 program [12,13]. Even though cholesterol is associated with cell membranes and  
96 interacts with multiple lipid species, very little is known about how lipids influence  
97 cholesterol trafficking. It was recently discovered that the *C. elegans* glycolipids,  
98 phosphoethanolamine glucosylceramides (PEGCs), stimulates the growth of worms by a  
99 yet unknown mechanism under conditions of cholesterol scarcity [14]. We also recently  
100 reported that the best studied endocannabinoids (eCBs) 2-arachidonoyl glycerol (2-AG)  
101 and arachidonoyl ethanolamine (AEA), which are lipid messengers that elicit a plethora  
102 of biological functions in mammals, enhance traffic of cholesterol in *C. elegans* [15]. We  
103 found that these eCBs stimulate worm growth under conditions of cholesterol scarcity  
104 and reverse the developmental arrest of *ncr-1-2* mutants [15]. *ncr-1* and *ncr-2* encode  
105 proteins with homology to the human Niemann-Pick type C (NP-C) disease gene (*NPC-*  
106 *1*) and are involved in the intracellular cholesterol trafficking in *C. elegans* [16]. The  
107 mechanism by which these signaling lipids exert their effects on cholesterol homeostasis  
108 within large endocrine networks is unknown. Here we show that 2-AG promotes  
109 cholesterol mobilization through pathways that are independent of known *C. elegans*  
110 cannabinoid-like receptors that mediates regulation of regenerative axon navigation  
111 [17] and behavior [18]. We find that mutations in the *ocr-2* and *osm-9* genes coding for  
112 transient receptors potential of the vanilloid subtype (TRPV), ion channels, dramatically  
113 reduces the effect of 2-AG in cholesterol mobilization. We also find that the insulin/IGF  
114 1 signaling (IIS) pathway and UNC-31/CAPS, the calcium-activated regulator of dense-  
115 core vesicles exocytosis (DCVs), are necessary for 2-AG-mediated stimulation of  
116 cholesterol mobilization. This suggests that 2-AG-dependent cholesterol traffic requires  
117 signaling of insulin peptides through the DAF-2 insulin receptor. Our results indicate that

118 2-AG acts as endogenous modulators of TRPV channels to control intracellular sterol  
119 traffic through modulation of the insulin/IGF-1 (IIS) signaling pathway.

120

121 **Results**

122 **FAAH-4 is involved in cholesterol homeostasis in *C. elegans*.**

123 *C. elegans* interrupts reproductive development and arrest as L2-like larvae when grown  
124 for two generations without cholesterol [9]. Previously, we have found that this arrest  
125 is abolished by supplementation with the eCB 2-AG [15, Fig.1A]. Recent work has  
126 revealed that the monoacylglycerol lipase FAAH-4, but not other FAAH enzymes in *C.*  
127 *elegans*, hydrolyzes 2-AG [19]. To test the specificity of eCB signaling we asked whether  
128 a *faah-4* deletion ( $\Delta faah-4$ ) could enhance the rescuing effect of 2-AG on the arrest  
129 induced by cholesterol depletion in *C. elegans*. Indeed, we found that under sterol free  
130 conditions exogenous 2-AG (50  $\mu$ M) significantly increases the formation of adults in  
131  $\Delta faah-4$  animals compared to wild-type animals (Fig 1A). In agreement with this result,  
132 *faah-4* animals displayed elevated levels of endogenous 2-AG compared to the wild type  
133 (Fig. 1B, [19]). Next, we investigated whether a *faah-4* deficiency relieves the phenotype  
134 of mutations that perturb cholesterol transport. We found that FAAH-4 RNAi decreased  
135 the Daf-c penetrance in null mutants for the Niemann-Pick homologues *ncr-1-2* (Fig 1C).  
136 As expected, FAAH-4 RNAi also enhanced the ability of a low concentration of 2-AG (10  
137  $\mu$ M) to suppress dauer formation of *ncr-1-2* double mutants (Fig 1C). These results  
138 confirm the specificity of 2-AG in cholesterol mobilization and suggest that FAAH-4 is an  
139 important enzyme in cholesterol homeostasis.

140

141

142

143 **2-AG controls cholesterol homeostasis through NPR-19 and NPR-32 independent**  
144 **pathways**

145 The biological effect of 2-AG in mammals are mediated through its interaction with the  
146 G -protein coupled type-1 (CB1) and type-2 (CB2) cannabinoid receptors [20–22]. In a  
147 study comparing of vertebrate CB1 to other G protein-coupled receptors (GPCRs) in the  
148 *C. elegans* genome, two neuropeptide receptors (NPRs), NPR-19 and NPR-32, were  
149 shown to have conservation of the critical amino acid residues involved in eCB ligand  
150 binding [17]. NPR-19 has been shown to be a 2-AG receptor that modulates  
151 monoaminergic (e.g., serotonin and dopamine) signaling in *C. elegans* [18]. To  
152 determine whether NPR-19 is required for the 2-AG-mediated stimulation of cholesterol  
153 mobilization, we screened the mutant animals for loss of 2-AG-dependent enhancement  
154 of cholesterol trafficking. In particular, we tested the interaction of NPR-19 with the  
155 DAF-7/TGF- $\beta$  pathway, which plays an important role in promoting development by  
156 affecting cholesterol metabolism and DA production [14]. *daf-7* mutants constitutively  
157 form dauer larvae when grown in normal dietary cholesterol (13  $\mu$ M) due to impaired  
158 cholesterol trafficking [14]. We found that *npr-19* did not increase the penetrance of  
159 Daf-C defects seen in *daf-7* mutants at 20°C (Fig 2A). Moreover, dauer formation in both  
160 *daf-7* and *daf-7; npr-19* mutant animals were rescued by either 2-AG or 2-  
161 arachidonoylglycerol-eter (2-AGE) (Fig 2A), a non-hydrolysable analog of 2-AG. In  
162 agreement with this prediction, 2-AG relieved the dauer arrest of *npr-19* and *npr-32*  
163 mutants when cholesterol was depleted from the diet (0  $\mu$ g/ml) (Fig 2B), indicating that  
164 2-AG stimulation of cholesterol trafficking is independent of NPR-19 and NPR-32.  
165 Moreover, 2-AG rescued the arrest of the double mutant *npr-19; npr-32* under  
166 cholesterol depletion, ruling out the possibility that these two receptors might



167 redundantly act in the eCB effect. Together, these data demonstrate that 2-AG acts in  
168 cholesterol mobilization through NPR-19 and NPR-32 independent pathways. We also  
169 tested several 2-AG candidates, such as GPCRs and neurotransmitter receptors,  
170 identified by examination of protein BLAST data using human CB1 receptors. However,  
171 we found that animals mutated in these potential targets were rescued by 2-AG, under  
172 cholesterol depletion (S1 Table).

### 173 **TRPV channels are required for 2-AG-dependent cholesterol mobilization**

174 In mammals many cannabinoids can activate transient receptor potential vanilloid  
175 (TRPV) channels [23]. *ocr-2* encodes a channel of the TRPV subfamily that functions in *C.*  
176 *elegans* olfaction, nociception and osmosensation [24]. We found that, similarly to *C.*  
177 *elegans fat-3* and *fat-4* mutants, which are deficient in PUFAs and display aberrant  
178 cholesterol mobilization [15], *ocr-2* animals displayed a high incidence of arrested larvae  
179 in the first generation without cholesterol (Fig 3A and 3B). While 2-AG suppresses dauer  
180 formation of *fat* mutants [15], 2-AG was unable to rescue the arrest of *ocr-2* animals  
181 starved from cholesterol. To determine the specificity of *ocr-2* requirement for  
182 mobilization of cholesterol, we examined mutants for other TRPV channels. The *C.*  
183 *elegans* genome encodes five members of the TRPV family, *ocr-1* through *ocr-4* and *osm-*  
184 *9*. We found that null mutations in *ocr-1*, *ocr-3* and *ocr-4* produced almost 100% gravid  
185 adults in the first generation without cholesterol. In contrast, about 50% of the *osm-9*  
186 animals starved of cholesterol exhibited a dauer-like phenotype in the first generation,  
187 similar to in *ocr-2* mutants. 2-AG was also unable to prevent the arrest of *osm-9* animals  
188 starved from cholesterol (Fig 3A). Together, these data demonstrate that both *osm-9*  
189 and *ocr-2* mutations eliminate 2-AG-dependent cholesterol mobilization.

190 In *C. elegans*, both, *osm-9* and *ocr-2* TRPV genes are expressed in the ADF serotonergic  
191 neurons and also co-expressed in five pairs of non-serotonergic chemosensory neurons:  
192 the AWA, ADL, ASH neurons in the head, and the PHA and PHB neurons in the tail [25].  
193 It has been reported that OSM-9 and OCR-2, regulate in ADF, 5-HT biosynthesis through  
194 the modulation of the *tph-1* gene expression, which encodes a key enzyme required for  
195 5-HT biosynthesis from tryptophan [26]. A recent report suggested that 2-AG stimulates  
196 5-HT release through a pathway requiring OSM-9, from the serotonergic ADF neurons  
197 to modulate *C. elegans* behavior [27]. However, we found that the ability of 2-AG to  
198 rescue the development of cholesterol depleted worms is unaffected by mutations in  
199 *tph-1* or in mutants in 5-HT receptors (S1 Fig and S1 Table). These results indicate that  
200 2-AG stimulation of cholesterol mobilization in *C. elegans* is independent of 5-HT  
201 release.

202 Both OSM-9 and OCR-2 are thought to function cooperatively and assemble into homo-  
203 and hetero-tetramers [28]. Recent electrophysiological studies employing a *Xenopus*  
204 *laevis* oocyte expression system demonstrated that OSM-9/OCR-2 respond to warming,  
205 suggesting that these channels cooperatively function as a temperature receptor [29].  
206 Because OSM-9 and OCR-2 channels mediate influx of divalent cations with a preference  
207 for calcium [30], we hypothesized that 2-AG is an agonist of channels containing OSM-9  
208 and/or OCR-2 subunits and that activation of the channel is the trigger mechanism for  
209 2-AG-induced mobilization of cholesterol in *C. elegans*. To test this hypothesis, we  
210 expressed OSM-9 and OCR-2 in *Xenopus* oocytes and recorded current Two-electrode  
211 voltage clamp. Our analysis showed that 2-AG did not elicit currents in *Xenopus* oocytes  
212 injected with *osm-9* and *ocr-2* cRNA either alone or in combination (S2 Fig). However,

213 warm stimulus (about 36 °C) evoked currents in *Xenopus* oocytes simultaneous injected  
214 with both *osm-9* and *ocr-2* cRNA (S2 Fig), indicating that the channel was active.

215 To determine whether 2-AG can induce neuronal activity in vivo in neurons that co-  
216 express *osm-9* and *ocr-2* we used calcium imaging. 100 μM 2-AG failed to induce calcium  
217 transients in animal that express the GCaMP6 in the ASH neurons (S3 Fig). Since 2-AG  
218 did not induce OSM-9/OCR-2 channel activation in vitro or in vivo, it suggests that this  
219 compound acts upstream or in parallel of TRPV channels in sensory transduction.

220 **The cannabinoid based T-Type calcium channel blocker NMP331 antagonizes the**  
221 **action of 2-AG on cholesterol mobilization.**

222 Since the effect of 2-AG on cholesterol mobilization appears not to be mediated by CB  
223 receptors orthologues (Fig 2), we tested synthetic cannabinoid ligands with the  
224 expectation that some of these compounds may act as inverse agonist/antagonist of 2-  
225 AG. This approach has been used to identify lipophilic molecules that interact with  
226 putative eCB receptors with conserved function but diverge from canonical mammalian  
227 receptors [31]. We reasoned that if a synthetic ligand blocks a cannabinoid signaling  
228 pathway involved in cholesterol trafficking, the Daf-c defects seen in *daf-7* mutants  
229 would be increased. We tested whether a series of CB1/CB2 receptor ligands (NMP  
230 compounds) that target both CB receptors and T-type calcium channels [32,33]  
231 modulate Daf-c phenotype of *daf-7* (e1372) mutants. Of the four compounds tested,  
232 only one compound, NMP331 (named as compound 10 in reference 33), at a  
233 concentration of 1μM robustly enhanced the dauer phenotype of *daf-7* at semi-  
234 permissive temperature (20°C) (Fig 4A). Supplementation of growth media with an  
235 excess of cholesterol lowered dauer formation in *daf-7* exposed to NMP331 (Fig 4B),

236 suggesting that this compound affects sterol mobilization. If NMP331 affects cholesterol  
237 mobilization, we predicted that wild-type animals in the presence of this compound  
238 would arrest already in the first generation without externally provided sterols. While  
239 wild type animals, produced almost 100% gravid adults in the first generation without  
240 cholesterol, exposure to NMP331 in the absence of cholesterol resulted in a high  
241 incidence (20%) of arrested larvae with typical dauer morphology (Fig 4C and S4A Fig).  
242 Furthermore, 2-AG antagonizes the enhancing effect of 1  $\mu$ M of NMP331 on dauer  
243 formation in *daf-7* worms in a dose-response manner (S4B Fig), suggesting that NMP331  
244 acts in the same pathway or in parallel to 2-AG.

245 Strikingly, when *fat-4* animals which are unable to synthesize AEA or 2-AG [15] were  
246 exposed to NMP331 in a cholesterol depleted medium formed 90% dauers in the first  
247 generation, while untreated animals produced mostly gravid adults (Fig 4C).

248 Using radio-ligand assays and electrophysiology in human embryonic kidney cells, it was  
249 determined that compound NMP331 in addition to show high affinity for CB1 receptors  
250 is also a blocker of the CaV3.2 T-type calcium channel [33]. Unlike vertebrates that  
251 possess three genes that encode T-calcium channels, the genome of *C. elegans* encodes  
252 a single T-type channel named *cca-1* [34]. We found that 2-AG-dependent cholesterol  
253 mobilization was still present in a *cca-1* mutant (Fig 4D), suggesting that this T-type  
254 channel is not the target of NMP331 antagonizing the 2-AG effect in *C. elegans*.

255 Taken together we conclude that NMP331 impacts cholesterol availability, transport  
256 and/or metabolism by antagonizing the stimulatory role of 2-AG in cholesterol  
257 mobilization. At this point we do not know whether NMP331 affects other molecular

258 targets, such as ion channels, involved in the cannabinoid-mediated modulation of  
259 cholesterol trafficking.

### 260 **SBP-1 is required for 2-AG modulation of cholesterol mobilization**

261 To identify potential *C. elegans* genes controlling the regulatory circuit of 2-AG-  
262 mediated cholesterol mobilization, we performed RNAi enhancer screen on *daf-7*  
263 temperature sensitive mutants, using an RNAi library containing transcriptions factors,  
264 transporters and nuclear receptors potentially involved in cholesterol homeostasis (S2  
265 Table). We first surveyed for enhancement of the *daf-7* Daf-c phenotype and, in a  
266 secondary survey, screened for loss of 2-AG-dependent rescue of the developmental  
267 arrest caused by cholesterol depletion.

268 We identified two loci, *nhr-8* and *sbp-1*, that in combination with *daf-7* give a strong Daf-  
269 c constitutive phenotype (S2 Table). *nhr-8*, codes for a nuclear receptor that plays an  
270 important role in cholesterol homeostasis in *C. elegans* [35], while *sbp-1*, encodes the  
271 single orthologue of the sterol regulatory element (SREBP) family which regulate  
272 transcription of genes required to many aspects of lipid metabolism [36]. We found that  
273 supplementation with 2-AG rescued the developmental arrest of *nhr-8* animals depleted  
274 of cholesterol (Fig 5A). Thus, *nhr-8* is not positioned within the 2-AG pathway of  
275 cholesterol mobilization. In contrast, 2-AG was unable to abolish the developmental  
276 arrest induced by cholesterol depletion in *sbp-1(ep79)* animals (Fig 5B). This suggests  
277 that 2-AG promotes mobilization of cholesterol, through a pathway requiring the  
278 transcriptional activity of SBP-1/SREBP. Consistent with this result, 2-AG was unable to  
279 suppress dauer formation in *ncr-1-2* mutants exposed to *sbp-1* RNAi, even though this  
280 Daf-c phenotype was largely suppressed by raising the cholesterol concentration in the

281 growth media (Fig 5C). Surprisingly, this high cholesterol concentration did not rescue  
282 the Daf-c phenotype of *ncr-1-2* mutants subjected to *sbp-1* RNAi. This suggests that *sbp-*  
283 *1* genetically interacts with the Niemann Pick proteins to regulate intracellular  
284 cholesterol trafficking. Finally, we found that *sbp-1* animals displayed elevated 2-AG  
285 levels compared with control animals (Fig 5D). This could be due to a compensatory  
286 mechanism to optimize cholesterol trafficking in animals depleted of SBP-1.

287 Taken together, our results suggest that SBP-1 in concert with the Niemann-Pick  
288 homologs plays an important role in the 2-AG signal transduction pathway to mobilize  
289 cholesterol.

#### 290 **Mobilization of sterols by 2-AG is controlled by the insulin pathway**

291 The DAF-2/IIS and DAF-7/TGF- $\beta$  signaling comprise the major endocrine pathways  
292 modulating the conversion of cholesterol into DA [13]. In a previous study it was shown  
293 that temperature-sensitive *daf-7* mutants are hypersensitive to cholesterol depletion  
294 and form dauer larvae in the absence of external cholesterol already at 20°C [14]. More  
295 recently, we reported that upon cholesterol deprivation 2-AG rescues the dauer arrest  
296 of *daf-7* animals [15]. We determined that 2-AG also prevents dauer formation in  
297 mutants which are defective in core components of the DAF-7/TGF- $\beta$  signaling pathway  
298 (S5A Fig), suggesting that 2-AG functions independently of this pathway.

299 Interestingly, *daf-2(e-1370)* mutants with reduced Insulin-IGF-1 receptor signaling also  
300 form about 90% dauers at 20°C in the first generation in the absence of cholesterol (S.  
301 Penkov and T. Kurzchalia, unpublished results). Nevertheless, unlike *daf-7* mutants, 2-  
302 AG could not suppress the dauer arrest of *daf-2* animals starved from cholesterol a 20°C  
303 (Fig 6A). This suggests that 2-AG-mediated mobilization of cholesterol depends on the

304 IIS pathway. We also tested the requirement of phosphoinositide-3 kinase AGE-1/PI3K  
305 or the serine threonine kinase AKT-1 that act downstream of the DAF-2 insulin receptor.  
306 2-AG was unable to suppress the dauer formation of both single mutants growing under  
307 sterol depleted conditions (Fig 6B-C). Finally, we found that the 2-AG antagonist,  
308 NMP331, does not enhance the Daf-c phenotype at 20°C of *daf-2(e1370)* mutants (S5B  
309 Fig). This result show that NMP331 requires a functional IIS signaling pathway for its  
310 effect on cholesterol trafficking. Taken together, our results suggest that IIS and 2-AG  
311 converge in a process essential for cholesterol mobilization.

### 312 **UNC-31 and HID-1 are required for 2-AG-dependent cholesterol mobilization**

313 We next sought to determine whether 2-AG rescued dauer formation in worms deficient  
314 in proteins that act upstream DAF-2, such as UNC-64/syntaxin [37] and UNC-31/CAPS  
315 [38]. *unc-64* and *unc-31* mutants have constitutive dauer formation at 27°C but not 25°C  
316 (Fig 6D) [39]. Dauer formation of *unc-64* mutant animals was markedly suppressed at  
317 27°C by either 2-AG or DA under normally dietary cholesterol. As expected, high  
318 concentrations of cholesterol also suppressed dauer formation of *unc-64* mutants at  
319 27°C (Fig 6D). In contrast, 2-AG was unable to suppress the Daf-c phenotype of *unc-31*  
320 mutants, suggesting that its gene product is essential for the 2-AG-dependent  
321 mobilization of cholesterol (Fig 6D). Consistent with a role of UNC-31 in cholesterol  
322 homeostasis, we found that DA rescues the dauer arrest of *unc-31* animals (Fig 6D). *unc-*  
323 *31* encodes the *C. elegans* homolog of mammalian Ca<sup>2+</sup> activated protein for secretion  
324 (CAPS), required for the regulated release of dense core vesicles (DCVs), which contain  
325 biogenic amines, neuropeptide, and insulins [38,40–42]. In addition, 2-AG was unable  
326 to rescue the Daf-c phenotype at 27°C of animals deficient in HID-1, a key component in

327 the secretion of DCVs [43] (S6A Fig). HID-1 is expressed in all neuron and gut cells of *C.*  
328 *elegans*. Expression of HID-1 under the *rab-3* promoter in neurons in a *hid-1(sa722)*  
329 mutant background was sufficient to partially restore the rescuing effect of 2-AG on  
330 dauer formation (S6B Fig). In contrast, 2-AG failed to rescue dauer formation when HID-  
331 1 was expressed under the *ges-1* promoter in the gut of *hid-1* animals (S6B Fig). Taken  
332 together, these experiments indicate that diminished neural release of DCVs impairs the  
333 effect of 2-AG on cholesterol mobilization.

334



## 335 Discussion

336 Although cannabis extracts have been used in folklore medicine for centuries, the past  
337 few years have increased interest in the medicinal use of cannabinoids, the bioactive  
338 components of the cannabis plant for treatment of many diseases of the nervous  
339 system. We have recently demonstrated that 2-AG and AEA, the best characterized eCBs  
340 reversed the blockade of intracellular trafficking of cholesterol in *C. elegans* [15]. Clearly,  
341 unraveling the molecular basis of cholesterol mobilization by eCBs in *C. elegans* could  
342 have important implications for a greater understanding of human pathological  
343 conditions associated with impaired cholesterol homeostasis. The endogenous  
344 cannabinoid 2-AG and AEA are synthesized within the brain and CNS [44]. Cannabinoids  
345 primarily activate G<sub>αo</sub>-coupled cannabinoid receptors 1 and 2 (CB1 and CB2)[20,22]. CB1  
346 is localized primarily in the brain and CNS, whereas CB2 is restricted to the periphery  
347 and certain leukocytes [45]. Although initial reports suggested that nematodes lacked a  
348 canonical CB receptor [46,47], it has been determined that *C. elegans* also possesses  
349 cannabinoid-like receptors [17,18]. NPR-19 is a functional orthologue to the mammalian  
350 CB1/2, and NPR-32, a functional orthologue to GPR18 and GPR55 [17]. Here we show  
351 that the modulation of cholesterol homeostasis by 2-AG is independent of the GPCRs  
352 NPR-19 and NPR-32 signaling. Instead, we found that 2-AG displays interactions with  
353 components of the insulin/IGF1 signaling, a major endocrine pathway modulating DA  
354 production and dauer formation. We determined that reduction of the IIS pathway by  
355 mutations in the insulin/IGF receptor homolog *daf-2*, the phosphoinositide-3 kinase  
356 AGE-1/PI3K or the serine threonine kinase AKT-1 result in animals that are not rescued  
357 by 2-AG in a cholesterol depleted medium (Fig. 6). Since reduction of DAF-2/IIS pathway  
358 activity affects significantly 2-AG signaling, we asked whether insulin like peptide

359 secretion control eCB-mediated cholesterol homeostasis. We found that the calcium-  
360 activated regulator of dense-core vesicle release (DCVs), UNC-31/CAPS, which functions  
361 in the nervous system to mediate release of insulin like peptides [38,40–42] is essential  
362 for 2-AG-mediated stimulation of cholesterol mobilization. This result combined with  
363 the requirement of *hid-1* for 2-AG signaling suggests that neural release of DCVs is  
364 required for 2-AG regulation of cholesterol homeostasis. We hypothesize that 2-AG  
365 stimulates cholesterol mobilization through the release of insulin-like peptides.

366 In agreement with early results [9] we have determined that after two generations of  
367 cholesterol depletion, DAF-16::GFP fusion protein exhibited significantly higher  
368 accumulation in the nucleus than did worms grown on cholesterol supplemented media  
369 (Fig 7A and S7 Fig). Exogenous 2-AG largely inhibited the nuclear localization of DAF-16  
370 (Fig 7A), adding important evidence that the eCB stimulates the mobilization of  
371 cholesterol and its conversion into DA. Once synthesized, DA binds to DAF-12 and in  
372 target tissues liganded DAF-12 releases DAF-16 from the nucleus promoting  
373 reproductive growth and inhibiting dauer programs [9].

374 The simplest model consistent with previous [15] and present results is that 2-AG has a  
375 dual role, promoting the release of insulin peptides contained in DCVs and removing  
376 cholesterol from internal pools (Fig 7B). It is not known how and where worms store  
377 the internal sterol pools. Even though cholesterol is associated with cell membranes  
378 and interacts with multiple lipid species, very little is known about how lipids influence  
379 cholesterol trafficking. One of the few examples is the positive effect of the phospholipid  
380 lysobisphosphatidic acid on the trafficking of cholesterol through the endolysosomal  
381 compartment [48]. Owing to the huge diversity of membrane lipids, multiple other lipid

382 species might emerge as additional modulators of the cholesterol trafficking process.

383 eCBs are amphiphilic molecules derived from phospholipids that are unlikely to diffuse

384 passively in the membrane. Several reports have shown that cholesterol behaves as a

385 specific binding partner for eCBs [49,50]. Following an initial interaction of either 2-AG

386 or AEA with cholesterol, mediated by the establishment of hydrogen bonds, they are

387 attracted towards the membrane interior forming a molecular complex [49,50]. This

388 raises the possibility that the interaction of 2-AG with cholesterol enhances the

389 intracellular trafficking of sterols to steroidogenic tissues, positively affecting production

390 of DAs. This regulated transport of cholesterol demands energy [51]. As upregulation of

391 the insulin pathway is linked to increased metabolic rates [52], 2-AG-mediated

392 activation of the DAF-2 pathway may induce a metabolic shift to provide the fuel needed

393 to meet the high energy demands of *C. elegans* cholesterol mobilization (Fig 7B). In

394 addition, stimulation of the IIS pathway should enforce, together with DA-bound DAF-

395 12, the DAF-16/FOXO nuclear export to rescue the arrest of cholesterol depleted worms

396 (Fig 7B).

397 Many of the physiological effects produced by eCBs are not completely understood. As

398 we report here, some of them may reflect their influence on cholesterol trafficking.

399 Interestingly, eCBs and eCB agonists are known to increase the hepatic expression of

400 SREBP in mice [53]. Here we show that the simple orthologue of mammalian SREBP in

401 *C. elegans*, SBP-1, plays an important role in 2-AG mobilization of cholesterol (Fig. 5B).

402 Notably, RNAi of SBP-1 increases the penetrance of Daf-c defects seen in *daf-2 (e1370)*

403 when grown in normal dietary cholesterol (S8 Fig). Although experimental evidence has

404 demonstrated that *daf-2* controls the expression of numerous genes predicted to

405 participate in fatty acid metabolism [54], it is not clear how DAF-2 and its regulatory

406 targets regulates lipid metabolism. Our findings indicate that SBP-1 and IIS converge on  
407 a critical physiological process potentially related to the role of eCBs in cholesterol  
408 availability (Fig 7B). Future work should elucidate the nature of such interaction.

409 The specific molecular mechanisms through which *C. elegans* sensory neurons detect  
410 eCBs remain to be deciphered, however our findings suggest a key role for the *osm-9*  
411 and *ocr-2* TRPV genes in the control of cholesterol trafficking mediated by 2-AG. We  
412 found that both *osm-9* and *ocr-2* arrest already in the first generation without externally  
413 provided sterols (Fig 3), reminiscent of *fat-3* and *fat-4* mutants which are aberrant in  
414 cholesterol mobilization because they are unable to synthesize AEA and 2-AG [15].  
415 Moreover, the arrest of *osm-9* and *ocr-2* mutants is not rescued by 2-AG, strongly  
416 suggesting that OSM-9/OCR-2 TRPV channel is essential for 2-AG-dependent cholesterol  
417 mobilization. Since the TRPV family encodes for non-selective cation channels with a  
418 preference for Ca<sup>2+</sup> [30], it is possible that that OCR-2/OSM-9 may directly activate  
419 insulin secretion through UNC-31, a Ca<sup>2+</sup> dependent regulator of DCVs release.

420 Although the exact mode of activation of OSM-9 and OCR-2 in neurons is partly  
421 understood, our data are consistent with the hypothesis that 2-AG acts upstream of the  
422 TRPV channel. Interestingly, it has been suggested that G-protein-coupled lipid signaling  
423 pathways regulate TRPV channel signaling in chemosensory neurons [55]. This yet to be  
424 identified pathway could be specific inhibited by the cannabinoid based calcium blocker  
425 NMP331, that potently competes with 2-AG in cholesterol mobilization (S4B Fig).

426 Our insights in the role of eCBs in nematode cholesterol homeostasis has added an  
427 important new piece of information. Yet, the puzzle remains incomplete, and many  
428 mechanistic questions have yet to be answered. It seems plausible that both worms and

429 mammals possess a fully functional eCB signaling pathway that regulates cholesterol  
430 homeostasis. Further dissecting cannabinoid regulation of lipid homeostasis in the  
431 context of larger endocrine networks should reveal how these processes alter disease  
432 states, health and possibly longevity.

433

434

435

436

437

438

439

440

441

442

443

444

445

446

447

448

449

450

451

452

453

454

455

456

## 457 **Materials and Methods**

458 **Materials.** 2-AG and 2-AGE were purchased from Cayman Chemical (Ann Arbor,  
459 Michigan, USA) and stock solutions are in acetonitrile at 1 mg/ml and are stored at -80  
460 °C. Cholesterol, Dubelcco's medium (DMEM) and antioxidant BHT were purchased from  
461 Sigma (Sigma-Aldrich, St. Louis, Missouri, USA).  $\Delta$ 4-DA and  $\Delta$ 7-DA were provided by Prof.  
462 H.-J. Knölker. All buffers, salts and chemical were reagent grade and were used without  
463 further treatments. Unless specified, all reagents were purchased from Merck or Sigma.  
464 The cannabinoid receptor ligands (NMP compounds) 241, 242, and 243 are named as  
465 compounds 40, 54 and 41 in reference 32. Compound NMP331 is named as compound  
466 10 in reference 33.

467

## 468 **Nematode maintenance and strains**

469 Standard *C. elegans* culture and molecular biology methods were used. Strains were  
470 cultured at 15°C or 20°C on nematode growth media (NGM) agar plates with the *E. coli*  
471 OP 50 strain as a food source [56]. The wild type strain was Bristol N2. Some strains were  
472 provided by the *Caenorhabditis* Genetics Center (CGC) at the University of Minnesota.  
473 The strains *hid-1 (sa722)*, *hid-1 (sa722); lin-15 (n765); jsEx897 [rab-3p-HID-1-GFP]*, *hid-*  
474 *1 (sa722); lin-15 (n765); jsEx909 [ges-1p-HID-1-GFP]*, *hid-1 (sa722); lin-15 (n765);*  
475 *jsEx896 [hid-1p-HID-1-GFP]* were kindly provided by D. Rayes. The strains used were: N2  
476 Bristol (wild-type), *daf-7(e1372)*, *daf-2(e1370)*, *daf-2(e1368)*, *fat-4 (ok958)*, *ncr-1*  
477 *(nr2022)*; *ncr-2 (nr2023)*, *npr-19 (ok2068)*, *tyra-3(ok325)*, *ckr-2(tm3082)*, *gar-2(ok520)*,  
478 *gar-3(vu78)*, *gar-1(ok755)*, *ser-2(ok2103)*, *npr-11 (ok594)*, *ser-1(ok345)*, *ser-5(ok3087)*,  
479 *npr-5(ok1583)*, *dop-1(vs101)* , *mod-1(ok103)* , *octr-1(ok371)*, *npr-16(ok1541)*, *ser-*  
480 *7(tm1325)*, *ser-4(ok512)*, *dop-2(vs105)*, *npr-24(ok312)* , *dop-1(ok398)*, *npr-32(ok2541)*,

481 *npr-35 (ok3258), gnrr-1 (ok238), age-1 (hx546), akt-1 (ok525), daf-4 (e1364), daf-8*  
482 *(e1393), unc-64 (e246), unc-31(e928), daf-14 (m77), daf-28 (sa191), faah-4 (lt121), sbp-*  
483 *1 (ep79), nhr-8 (ok186), ocr-1 (ok132), ocr-2 (ok1711), ocr-3 (ok1559), ocr-4 (vs137),*  
484 *osm-9 (ok1677), daf-11 (m47), tph-1 (mg280), daf-36 (k114), cca-1 (ok3442), zls356 [daf-*  
485 *16p::daf-16a/b::GFP + rol-6(su1006)]. hid-1 (sa722), hid-1 (sa722); lin-15 (n765); jsEx897*  
486 *[rab-3p-HID-1-GFP], hid-1 (sa722); lin-15 (n765); jsEx909 [ges-1p-HID-1-GFP], hid-1*  
487 *(sa722); lin-15 (n765); jsEx896 [hid-1p-HID-1-GFP]; xuEx1978 [Psra-6::Gcamp6(f), Psra-*  
488 *6::DsRed].*

489

#### 490 **Preparation of sterol-depleted plates and sterol-deprived worm culture.**

491 To obtain sterol-free conditions, agar was replaced by ultrapure agarose and peptone  
492 was omitted from plates as described earlier [15]. Briefly, agarose was washed three  
493 times overnight with chloroform to deplete the trace sterols in it. Salt composition was  
494 kept identical to NGM plates. As a food source, *E. coli* NA22 grown overnight in sterol-  
495 free culture medium DMEM was used. Bacteria were rinsed with M9 buffer and 20 times  
496 concentrated. Bleached embryos were grown for one generation on sterol-free agarose  
497 plates. The resulting gravid adults were bleached and the obtained embryos were used  
498 in various assays.

499

#### 500 **Generation of *daf-7*; *npr-19* and *npr-19;npr-32* double mutants.**

501 The *daf-7* and *npr-32* mutants were each crossed into *npr-19* to generate double  
502 mutants by standard methods. Crosses were confirmed by PCR genotyping and  
503 constitutive dauer arrest at 25°C.

#### 504 **Dauer formation assays**

505 Dauer assays were performed as previously described [15]. In general, 60–80 L1s or  
506 embryos were transferred to NGM plates seeded with *E. coli* (HT115 or OP50). eCBs  
507 (final concentration 50  $\mu$ M) or NMP331 (final concentration 1  $\mu$ M or as indicated in  
508 Supplementary Fig. 1) were added to the bacteria immediately prior to seeding. The final  
509 concentrations of these compounds were calculated according to the volume of the  
510 NGM agar used for the preparation of the plates. Depending on the sort of essays after  
511 3, 4 or 5 days the dauer percentage was scored.  $\Delta$ 7-DA was used alternatively in dauer  
512 rescue experiments at a concentration of 90nM.

513

#### 514 **Lipid Extraction and endocannabinoid analysis by HPLC-MS/MS.**

515 The protocol is adaptation of Folch (1957) [57]. Briefly, lipid extracts were made from  
516 approximately 200 mg of frozen worm pellets grown at 20 °C. Pellets were washed with  
517 M9 buffer, then re-suspended in 1.3 ml pure methanol and sonicated three times for 30  
518 seconds. After sonication 2.6 ml of chloroform and 1.3 ml 0.5 M KCl/0.08 M H<sub>3</sub>PO<sub>4</sub> were  
519 added. Butylated hydroxytoluene (BHT, 0.005 % v/v) was added to prevent lipid  
520 oxidation. Samples were then sonicated for 15 min, vortexed twice for 1 min and  
521 centrifuged for 10 min at 2.000 x g to induce phase separation. The lower, hydrophobic  
522 phase was collected, dried under constant nitrogen stream, re-suspended in 100  $\mu$ l of  
523 acetonitrile and loaded into dark caramel tubes using a glass pipette.

524 2-AG was quantified from nematode samples by liquid  
525 chromatography (Ultimate 3000 RSLC Dionex, Thermo Scientific) coupled with an ESI  
526 triple quadrupole mass spectrometer (TSQ Quantum Access Max  
527 (QQQ), Thermo-Scientific) as previously described [15].

#### 528 **DAF-16::GFP expression analysis**



529 An stably integrated DAF-16::GFP, TJ356 was used. The expression of GFP was observed  
530 using a Nikon Eclipse 800 microscope equipped with a fluorescent light source. The  
531 images were captured with a Andor Clara digital camera.

532 To observe GFP distribution, 15-25 animals were mounted to an agar pad containing 20  
533 mM sodium azide and analyzed immediately. No animal on the pad for more 10 min was  
534 scored. DAF-16::GFP distribution was categorized based on the accumulation of GFP in  
535 the nucleus or the cytoplasm (diffuse form) in the whole animal. Individual animals were  
536 classified based on the presence of nuclear DAF-16::GFP in approximately 90%, 70%  
537 (High translocation), 50%, 30% (Middle traslocation), 10% or none (Low Translocation)  
538 of the body cells, as shown in Figure Supplementary 7. All the animals scored were at  
539 the stage of L2 after 72 hs of growing in the second generation under free sterol  
540 conditions.

541

#### 542 **Two-electrode voltage clamp in *Xenopus oocytes*.**

543 For electrophysiological recording in *Xenopus levis* oocytes, OSM-9, OCR-2 subunits  
544 subcloned into a modified pGEMHE vector were used. cRNAs were in vitro transcribed  
545 from linearized plasmid DNA templates using RiboMAX<sup>TM</sup> Large Scale RNA Production  
546 System (Promega, Madison, WI, USA). *Xenopus* oocytes were injected with 50 nl of  
547 RNase-free water containing 1.0 ng of cRNA (at a 1:1 molar ratio for heteromeric  
548 receptors) and maintained in Barth's solution [in mM: NaCl 88, Ca(NO<sub>3</sub>)<sub>2</sub> 0.33, CaCl<sub>2</sub>  
549 0.41, KCl 1, MgSO<sub>4</sub> 0.82, NaHCO<sub>3</sub> 2.4, HEPES 10] at 18°C. Electrophysiological recordings  
550 were performed at -60 mV under two-electrode voltage-clamp with an Oocyte Clamp  
551 OC-725B or C amplifier (Warner Instruments Corporation, Hamden, CT, USA).  
552 Recordings were filtered at a corner frequency of 10 Hz using a 900 BT Tunable Active

553 Filter (Frequency Devices Inc., Ottawa, IL, USA). Data acquisition was performed using a  
554 Patch Panel PP-50 LAB/1 interphase (Warner Instruments Corp., Hamden, CT, USA) at a  
555 rate of 10 points per second. Both voltage and current electrodes were filled with 3M  
556 KCl and had resistances of  $\sim 1\text{M}\Omega$ . Data were analysed using Clampfit from the pClamp  
557 6.1 software (Molecular Devices, Sunnyvale, CA). During electrophysiological recordings  
558  $100\ \mu\text{M}$  2-AG was added to the perfusion solution. Recording was performed at room  
559 temperature and heat-stimulation ( $\sim 36\ \text{°C}$ ) by perfusion of heated Barth's. The  
560 temperature of perfused bath solutions was checked with a TC-344B temperature  
561 controller (Warner Instruments) located near the oocytes. Mean  $\pm$  SEM of current  
562 amplitudes of responses to temperature,  $100\ \mu\text{M}$  2-AG and temperature plus  $100\ \mu\text{M}$  2-  
563 AG in oocytes injected with either OSM-9, OCR-2 or OSM-9/OCR-2 were calculated using  
564 Prism 6 software (GraphPad Software Inc., La Jolla, CA, USA).

#### 565 **ASH calcium imaging.**

566 Animals expressing GCaMP6 in the ASH (xuEx1978 [Psra-6::Gcamp6(f), Psra-6::DsRed])  
567 were immobilized in a PDMS microfluidic olfactory chip [58,59] and exposed to either a  
568 control buffer or a stimulus buffer containing  $100\text{mM}$  2-AG (Cayman Chemical Co.  
569 #62160). The required volume of 2-AG required to make  $100\text{mM}$  solution was dissolved  
570 in 0.1% ethanol before being added to S-Basal buffer. Since the 2-AG stock solution was  
571 dissolved in acetonitrile, we added an equivalent volume of acetonitrile and 0.1%  
572 ethanol S-basal to make the control buffer. This ensured the responses were specific to  
573 2-AG. The stimulus protocol was based on previously described exposure experiments  
574 [55]. Animals were allowed to acclimate in the olfactory chip for at least 5 minutes  
575 before recording. Recording was performed at 10x magnification on an AxioObserver A1

576 inverted microscope (Zeiss) connected to a Sola SE Light Engine (Lumencor) and an  
577 ORCA-Flash 4.0 digital CMOS camera (Hamamatsu). Micromanager Software [60] was  
578 used to control image acquisition. Recording was performed at 10 frames per second  
579 and 4x4 image binning. An Arduino was used to control pinch valves to direct stimulus  
580 and control buffer to the nose of animals in the following sequence: 6 second baseline,  
581 4 second stimulation, 10 second interstimulus interval, 4 second stimulation, 6 second  
582 washout. GCaMP fluorescence was extracted using Matlab (Mathworks) scripts and the  
583 results were plotted using GraphPad Prism.

#### 584 **Acknowledgments**

585 Supported by grants of Richard Lounsbery Foundation (to D.d.M) and NIH GM1140480  
586 (to M.J.A). Some strains were provided by the CGC, which is funded by NIH Office of  
587 Research Infrastructure Programs (P40 OD010440). We thank Sider Penkov and  
588 Teymuras Kurzchalia for sharing unpublished data, to Luisa Cochella, Cecilia Mansilla and  
589 Claudia Banchio for critically reading the manuscript and to Diego Rayes and Shawn Xu  
590 for the worm strains.

591

592

593

594

595

596

597 **References**

- 598 1. Kritchevsky SB, Kritchevsky D. Serum cholesterol and cancer risk: An  
599 Epidemiologic Perspective. *Annu Rev Nutr.* 1992.  
600 doi:10.1146/annurev.nu.12.070192.002135
- 601 2. Woollett LA. Where does fetal and embryonic cholesterol originate and what  
602 does it do? *Annual Review of Nutrition.* 2008. pp. 97–114.  
603 doi:10.1146/annurev.nutr.26.061505.111311
- 604 3. Cai J, Pajak A, Li Y, Shestov D, Davis CE, Rywik S, et al. Total cholesterol and  
605 mortality in China, Poland, Russia, and the US. *Ann Epidemiol.* 2004;14: 399–  
606 408. doi:10.1016/j.annepidem.2003.10.012
- 607 4. Iqbal J, Hussain MM. Intestinal lipid absorption. *Am J Physiol Endo-crinol Metab.*  
608 2009;296: 1183–1194. doi:10.1152/ajpendo.90899.2008.
- 609 5. Martins IJ, Hone E, Foster JK, Sünram-Lea SI, Gnjec A, Fuller SJ, et al.  
610 Apolipoprotein E, cholesterol metabolism, diabetes, and the convergence of risk  
611 factors for Alzheimer’s disease and cardiovascular disease. *Molecular Psychiatry.*  
612 2006. pp. 721–736. doi:10.1038/sj.mp.4001854
- 613 6. Patel TN, Shishehbor MH, Bhatt DL. A review of high-dose statin therapy:  
614 targeting cholesterol and inflammation in atherosclerosis. *Eur Heart J.* 2007;28:  
615 664–672. doi:10.1093/eurheartj/ehl445
- 616 7. Paul H A Steegmans, Durk Fekkes, Arno WHOes, Annette AA Bak, Emiel van der  
617 Does DEG. Low serum cholesterol concentration and serotonin metabolism in  
618 men. *BMJ.* 1996;312: 221. doi:10.1136/bmj.312.7025.221

- 619 8. Sturley SL, Patterson MC, Balch W, Liscum L. The pathophysiology and  
620 mechanisms of NP-C disease. *Biochim Biophys Acta*. 2004;1685: 83–7.  
621 doi:10.1016/j.bbaliip.2004.08.014
- 622 9. Matyash V, Entchev E V, Mende F, Wilsch-Brauninger M, Thiele C, Schmidt AW,  
623 et al. Sterol-Derived Hormone(s) Controls Entry into Diapause in *Caenorhabditis*  
624 *elegans* by Consecutive Activation of DAF-12 and DAF-16. *PLoS Biol*. 2004;2:  
625 1561–1571. doi:10.1371/journal.pbio.0020280
- 626 10. Matyash V, Geier C, Henske A, Mukherjee S, Hirsh D, Thiele C, et al. Distribution  
627 and transport of cholesterol in *Caenorhabditis elegans*. *Mol Biol Cell*. 2001;12:  
628 1725–1736. doi:10.1091/mbc.12.6.1725
- 629 11. Motola DL, Cummins CL, Rottiers V, Sharma KK, Li T, Li Y, et al. Identification of  
630 Ligands for DAF-12 that Govern Dauer Formation and Reproduction in *C.*  
631 *elegans*. *Cell*. 2006;124: 1209–1223. doi:10.1016/j.cell.2006.01.037
- 632 12. Wollam J, Antebi A. Sterol Regulation of Metabolism, Homeostasis, and  
633 Development. *Annu Rev Biochem*. 2011;80: 885–916. doi:10.1146/annurev-  
634 biochem-081308-165917
- 635 13. Antebi A. Nuclear receptor signal transduction in *C. elegans*. *WormBook*. 2015;  
636 1–49. doi:10.1895/wormbook.1.64.2
- 637 14. Boland S, Schmidt U, Zagoriy V, Sampaio JL, Fritsche RF, Czerwonka R, et al.  
638 Phosphorylated glycosphingolipids essential for cholesterol mobilization in  
639 *Caenorhabditis elegans*. *Nat Chem Biol*. 2017. doi:10.1038/nchembio.2347
- 640 15. Galles C, Prez GM, Penkov S, Boland S, Porta EOJ, Altabe SG, et al.

- 641 Endocannabinoids in *Caenorhabditis elegans* are essential for the mobilization  
642 of cholesterol from internal reserves. *Sci Rep.* 2018;8: 1–12.  
643 doi:10.1038/s41598-018-24925-8
- 644 16. Jie Li, Gemma Brown, Michael Ailion SL and JHT. NCR-1 and NCR-2, the *C.*  
645 *elegans* homologs of the human Niemann-Pick type C1 disease protein, function  
646 upstream of DAF-9 in the dauer formation pathways. *Development.* 2004;131:  
647 5741–5752. doi:10.1242/dev.01408
- 648 17. Pastuhov SI, Matsumoto K, Hisamoto N. Endocannabinoid signaling regulates  
649 regenerative axon navigation in *Caenorhabditis elegans* via the GPCRs NPR-19  
650 and NPR-32. *Genes to Cells.* 2016;21: 696–705. doi:10.1111/gtc.12377
- 651 18. Oakes MD, Law WJ, Clark T, Bamber BA, Komuniecki R. Cannabinoids Activate  
652 Monoaminergic Signaling to Modulate Key *C. elegans* Behaviors. *J Neurosci.*  
653 2017;37: 2859–2869. doi:10.1523/JNEUROSCI.3151-16.2017
- 654 19. Chen AL, Lum KM, Lara-Gonzalez P, Ogasawara D, Coghnetta AB, To A, et al.  
655 Pharmacological convergence reveals a lipid pathway that regulates *C. elegans*  
656 lifespan. *Nat Chem Biol.* 2019;15: 453–462. doi:10.1038/s41589-019-0243-4
- 657 20. Li X, Shen L, Hua T, Liu ZJ. Structural and Functional Insights into Cannabinoid  
658 Receptors. *Trends Pharmacol Sci.* 2020;41: 665–677.  
659 doi:10.1016/j.tips.2020.06.010
- 660 21. Hua T, Vemuri K, Nikas SP, Laprairie RB, Wu Y, Qu L, et al. Crystal structures of  
661 agonist-bound human cannabinoid receptor CB 1. *Nature.* 2017;547: 468–471.  
662 doi:10.1038/nature23272

- 663 22. Li X, Hua T, Vemuri K, Ho J, Wu Y, Wu L, et al. Crystal Structure of the Human  
664 Cannabinoid Receptor CB2. *Cell*. 2019;176: 459–467.  
665 doi:10.1016/j.cell.2018.12.011.Crystal
- 666 23. Muller C, Morales P, Reggio PH. Cannabinoid ligands targeting TRP channels.  
667 *Front Mol Neurosci*. 2019;11: 1–15. doi:10.3389/fnmol.2018.00487
- 668 24. Tobin DM, Madsen DM, Kahn-Kirby A, Peckol EL, Moulder G, Barstead R, et al.  
669 Combinatorial expression of TRPV channel proteins defines their sensory  
670 functions and subcellular localization in *C. elegans* neurons. *Neuron*. 2002;35:  
671 307–318. doi:10.1016/S0896-6273(02)00757-2
- 672 25. Bargmann CI. Chemosensation in *C. elegans*. *WormBook*. 2006; 1–29.  
673 doi:10.1895/wormbook.1.123.1
- 674 26. Zhang S, Sokolchik I, Blanco G, Sze JY. *Caenorhabditis elegans* TRPV ion channel  
675 regulates 5HT biosynthesis in chemosensory neurons. *Development*. 2004;131:  
676 1629–1638. doi:10.1242/dev.01047
- 677 27. Oakes M, Law WJ, Komuniecki R. Cannabinoids stimulate the TRP channel-  
678 dependent release of both serotonin and dopamine to modulate behavior in *C.*  
679 *elegans*. *J Neurosci*. 2019;39: 4142–4152. doi:10.1523/JNEUROSCI.2371-18.2019
- 680 28. Kahn-Kirby AH, Bargmann CI. TRP channels in *C. elegans*. *Annu Rev Physiol*.  
681 2006;68: 719–736. doi:10.1146/annurev.physiol.68.040204.100715
- 682 29. Ohnishi K, Saito S, Miura T, Ohta A, Tominaga M, Sokabe T, et al. OSM-9 and  
683 OCR-2 TRPV channels are accessorial warm receptors in *Caenorhabditis elegans*  
684 temperature acclimatisation. *Sci Rep*. 2020;10: 1–14. doi:10.1038/s41598-020-

685 75302-3

686 30. Benham CD, Davis JB, Randall AD. Vanilloid and TRP channels: A family of lipid-  
687 gated cation channels. *Neuropharmacology*. 2002;42: 873–888.

688 doi:10.1016/S0028-3908(02)00047-3

689 31. Reis Rodrigues P, Kaul TK, Ho J-H, Lucanic M, Burkewitz K, Mair WB, et al.

690 Synthetic Ligands of Cannabinoid Receptors Affect Dauer Formation in the

691 Nematode *Caenorhabditis elegans*. *Genes|Genomes|Genetics*. 2016;6: 1695–

692 1705. doi:10.1534/g3.116.026997

693 32. Ravil R. Petrova, Lindsay Knight, Shao-Rui Chen, Jim Wager-Miller, Steven W.

694 McDaniel, Fanny Diaz, et al. Mastering tricyclic ring systems for desirable

695 functional cannabinoid activity. *Eur J Med Chem*. 2013;69: 881–907.

696 doi:doi:10.1016/j.ejmech.2013.09.038

697 33. Bladen C, McDaniel SW, Gadotti VM, Petrov RR, Berger ND, Diaz P, et al.

698 Characterization of Novel Cannabinoid Based T-Type Calcium Channel Blockers

699 with Analgesic Effects. *ACS Chem Neurosci*. 2014;6: 277–287.

700 doi:10.1021/cn500206a

701 34. Steger KA, Shtonda BB, Thacker C, Snutch TP, Avery L. The *C. elegans* T-type

702 calcium channel CCA-1 boosts neuromuscular transmission. *J Exp Biol*. 2005.

703 doi:10.1242/jeb.01616

704 35. Magner DB, Wollam J, Shen Y, Hoppe C, Li D, Latza C, et al. The NHR-8 nuclear

705 receptor regulates cholesterol and bile acid homeostasis in *C. elegans*. *Cell*

706 *Metab*. 2013;18: 212–224. doi:10.1016/j.cmet.2013.07.007



- 707 36. Taghibiglou C, Martin HGS, Rose JK, Ivanova N, Lin CHC, Lau HL, et al. Essential  
708 role of SBP-1 activation in oxygen deprivation induced lipid accumulation and  
709 increase in body width/length ratio in *Caenorhabditis elegans*. *FEBS Lett.*  
710 2009;583: 831–834. doi:10.1016/j.febslet.2009.01.045
- 711 37. Saifee O, Wei L, Nonet ML. The *Caenorhabditis elegans* unc-64 locus encodes a  
712 syntaxin that interacts genetically with synaptobrevin. *Mol Biol Cell.* 1998;9:  
713 1235–1252. doi:10.1091/mbc.9.6.1235
- 714 38. Ann K, Kowalchuk JA, Loyet KM, Martin TFJ. Novel Ca<sup>2+</sup>-binding protein (CAPS)  
715 related to UNC-31 required for Ca<sup>2+</sup>-activated exocytosis. *J Biol Chem.*  
716 1997;272: 19637–19640. doi:10.1074/jbc.272.32.19637
- 717 39. Ailion M, Inoue T, Weaver CI, Holdcraft RW, Thomas JH. Neurosecretory control  
718 of aging in *Caenorhabditis elegans*. *Proc Natl Acad Sci U S A.* 1999;96: 7394–  
719 7397. doi:10.1073/pnas.96.13.7394
- 720 40. Berwin B, Floor E, Martin TFJ. CAPS (Mammalian UNC-31) Protein Localizes to  
721 Membranes Involved in Dense-Core Vesicle Exocytosis. *Neuron.* 1998;21: 137–  
722 145. doi:10.1016/s0896-6273(00)80521-8
- 723 41. Leinwand SG, Chalasani SH. From genes to circuits and behaviors:  
724 Neuropeptides expand the coding potential of the nervous system. *Worm.*  
725 2014;3: e27730. doi:10.4161/worm.27730
- 726 42. Lee BH, Ashrafi K. A TRPV channel modulates *C. elegans* neurosecretion, larval  
727 starvation survival, and adult lifespan. *PLoS Genet.* 2008;4: 1–14.  
728 doi:10.1371/journal.pgen.1000213

- 729 43. Yu Y, Wang L, Jiu Y, Zhan Y, Liu L, Xia Z, et al. HID-1 is a novel player in the  
730 regulation of neuropeptide sorting. *Biochem J.* 2011;434: 383–390.  
731 doi:10.1042/BJ20110027
- 732 44. Di Marzo V, Bifulco M, De Petrocellis L. The endocannabinoid system and its  
733 therapeutic exploitation. *Nat Rev Drug Discov.* 2004;3: 771–784.  
734 doi:10.1038/nrd1495
- 735 45. Cristino L, Bisogno T, Di Marzo V. Cannabinoids and the expanded  
736 endocannabinoid system in neurological disorders. *Nat Rev Neurol.* 2020;16: 9–  
737 29. doi:10.1038/s41582-019-0284-z
- 738 46. Clarke TL, Johnson RL, Simone JJ, Carlone RL. The endocannabinoid system and  
739 invertebrate neurodevelopment and regeneration. *Int J Mol Sci.* 2021;22: 1–24.  
740 doi:10.3390/ijms22042103
- 741 47. Lucanic M, Held JM, Vantipalli MC, Klang IM, Graham JB, Gibson BW, et al. N-  
742 acylethanolamine signalling mediates the effect of diet on lifespan in  
743 *Caenorhabditis elegans*. *Nature.* 2011;473: 226–229. doi:10.1038/nature10007
- 744 48. Kobayashi T, Beuchat MH, Lindsay M, Frias S, Palmiter RD, Sakuraba H, et al.  
745 Late endosomal membranes rich in lysobisphosphatidic acid regulate cholesterol  
746 transport. *Nat Cell Biol.* 1999;1: 113–118. doi:10.1038/10084
- 747 49. Dainese E, Oddi S, Maccarrone M. Interaction of Endocannabinoid Receptors  
748 with Biological Membranes. *Curr Med Chem.* 2010;17: 1487–1499.  
749 doi:10.2174/092986710790980087
- 750 50. Di Scala C, Fantini J, Yahi N, Barrantes FJ, Chahinian H. Anandamide revisited:

- 751           How cholesterol and ceramides control receptor-dependent and receptor-  
752           independent signal transmission pathways of a lipid neurotransmitter.  
753           Biomolecules. 2018;8. doi:10.3390/biom8020031
- 754   51.   de Boer JF, Kuipers F, Groen AK. Cholesterol Transport Revisited: A New Turbo  
755           Mechanism to Drive Cholesterol Excretion. Trends Endocrinol Metab. 2018;29:  
756           123–133. doi:10.1016/j.tem.2017.11.006
- 757   52.   Van Voorhies WA, Ward S. Genetic and environmental conditions that increase  
758           longevity in *Caenorhabditis elegans* decrease metabolic rate. Proc Natl Acad Sci  
759           U S A. 1999;96: 11399–11403. doi:10.1073/pnas.96.20.11399
- 760   53.   Osei-Hyiaman D, DePetrillo M, Pacher P, Liu J, Radaeva S, Bátkai S, et al.  
761           Endocannabinoid activation at hepatic CB 1 receptors stimulates fatty acid  
762           synthesis and contributes to diet-induced obesity. J Clin Invest. 2005;115: 1298–  
763           1305. doi:10.1172/JCI200523057
- 764   54.   Murphy CT, Hu PJ. Insulin/insulin-like growth factor signaling in *C. elegans*.  
765           WormBook. 2013; 1–43. doi:10.1895/wormbook.1.164.1
- 766   55.   Kahn-Kirby AH, Dantzker JLM, Apicella AJ, Schafer WR, Browse J, Bargmann CI,  
767           et al. Specific polyunsaturated fatty acids drive TRPV-dependent sensory  
768           signaling in vivo. Cell. 2004;119: 889–900. doi:10.1016/j.cell.2004.11.005
- 769   56.   Brenner S. The genetics of *Caenorhabditis elegans*. Genetics. 1974;77: 71–94.  
770           doi:10.1093/genetics/77.1.71
- 771   57.   Folch J, Lees M, Slone stanley GH. A simple method for the isolation and  
772           purification of total lipides from animal tissues. J Biol Chem. 1957;226: 497–509.

773 doi:10.1016/s0021-9258(18)64849-5

774 58. Chalasani SH, Chronis N, Tsunozaki M, Gray JM, Ramot D, Goodman MB, et al.

775 Dissecting a circuit for olfactory behaviour in *Caenorhabditis elegans*. *Nature*.

776 2007;450: 63–70. doi:10.1038/nature06292

777 59. Chronis N, Zimmer M, Bargmann CI. Microfluidics for in vivo imaging of neuronal

778 and behavioral activity in *Caenorhabditis elegans*. *Nat Methods*. 2007;4: 727–

779 731. doi:10.1038/nmeth1075

780 60. Arthur D. Edelstein, Mark A. Tsuchida, Nenad Amodaj, Henry Pinkard, Ronald D.

781 Vale and NS. Advanced methods of microscope control using  $\mu$ Manager

782 software. *J Biol Methods*. 2015;1: 1–18. doi:10.14440/jbm.2014.36

783

784

785

786

787

788

789

790

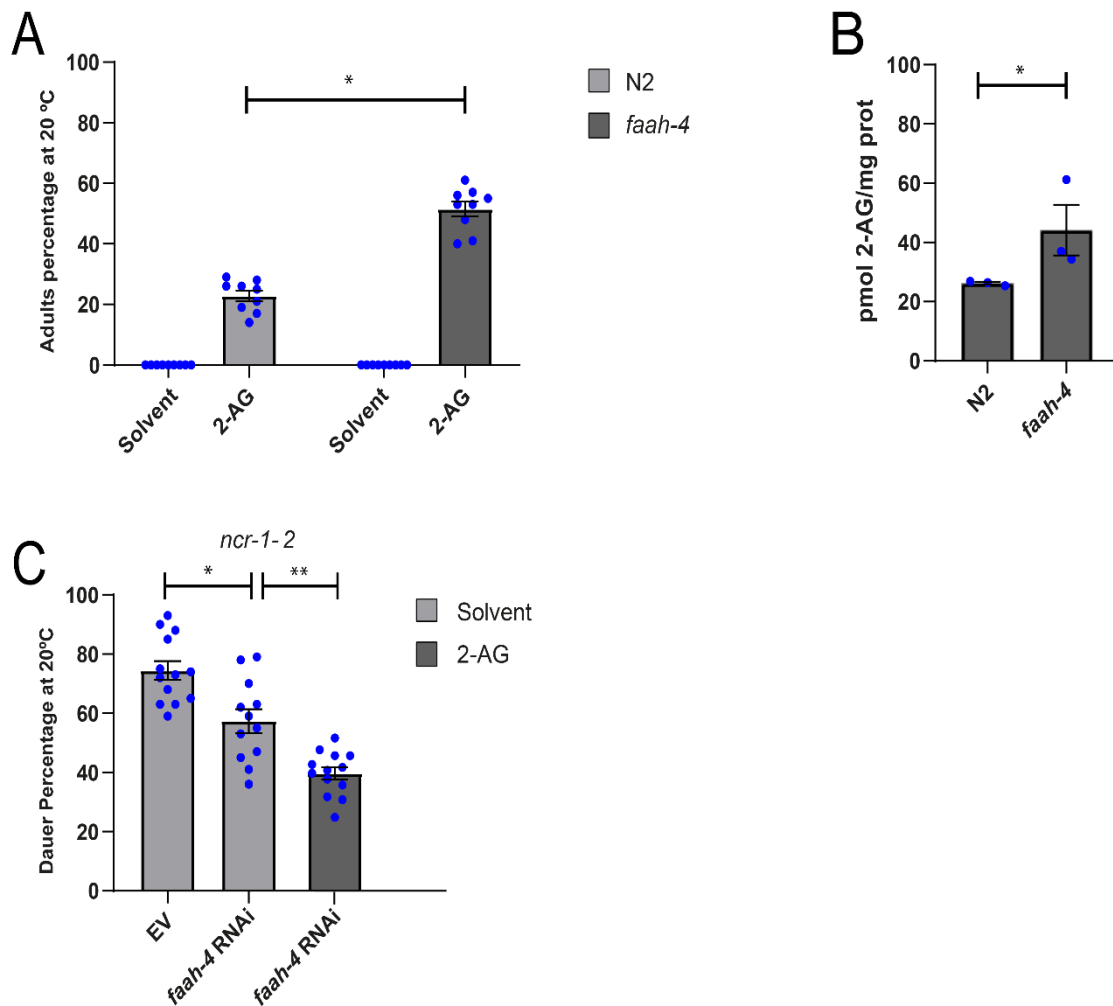

791

792 **Fig 1. FAAH-4 is involved in cholesterol mobilization by 2-AG.** (A) Wild type and *faah-4*  
793 animals grown for two generations in the absence of cholesterol at 20 °C arrest as L2-  
794 like larvae. Feeding with 2-AG (50 µg/ml) increases the formation of adults in *faah-4*  
795 animals compared with N2 animals. All Pairwise Multiple Comparison Procedures  
796 (Dunn's Method), \* $p < 0.05$ . All values from  $n = 3$  independent experiments are shown  
797 as Mean  $\pm$  SEM. (B) Intracellular levels of 2-AG are elevated in *faah-4* animals. T-test, \* $p$   
798  $< 0.005$ . All values from  $n = 3$  independent experiments show as Mean  $\pm$  SEM. (C) *faah-*  
799 *4* RNAi reduces the dauer formation of strain *ncr-1-2* and enhances the ability of low  
800 concentrations of 2-AG (10 µM) to suppress the *daf-c* phenotype of these animals. All  
801 Pairwise Multiple Comparison Procedures (Holm-Sidak method), \* $p < 0.002$ , \*\* $p <$   
802  $0.001$ . All values from  $n \geq 3$  independent experiments are shown as Mean  $\pm$  SEM. N2 is  
803 the *C. elegans* wild-type strain.

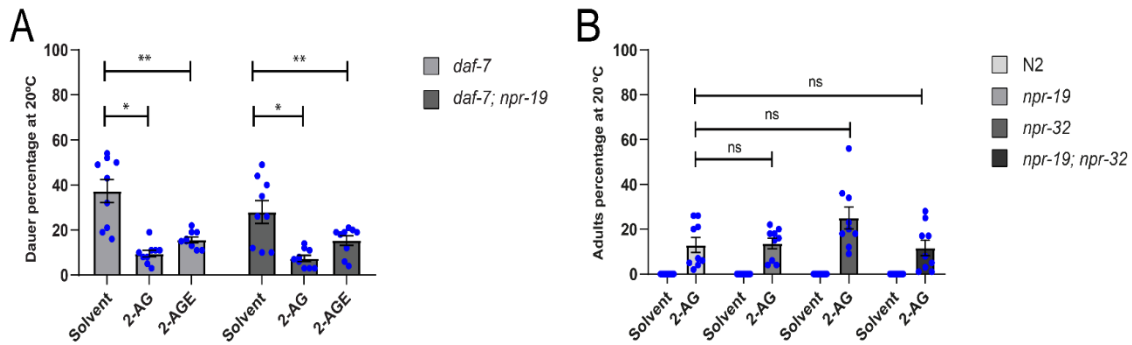

804

805 **Fig 2. Endocannabinoids stimulate transport of cholesterol by employing pathways**  
806 **independent of *npr-19* and *npr-32*.** (A) Endocannabinoid suppress dauer arrest of *daf-7*  
807 and *daf-7; npr-19* grown on plates containing 5  $\mu\text{g}/\text{ml}$  of cholesterol. Mann-Whitney rank  
808 sum test, \* $p < 0.001$ , \*\* $p < 0.001$ . All values from  $n = 3$  independent experiments are  
809 shown as Mean  $\pm$  SEM. (B) 2-AG suppress larval arrest of *npr-19*, *npr-32* and *npr-19; npr-32*  
810 animals grown for two generations on plates containing 0  $\mu\text{g}/\text{ml}$  of cholesterol. All values  
811 from  $n = 3$  independent experiments show as Mean  $\pm$  SEM. ns = not significant. N2 is the  
812 *C. elegans* wild-type strain.

813

814

815

816

817

818

819

820

821

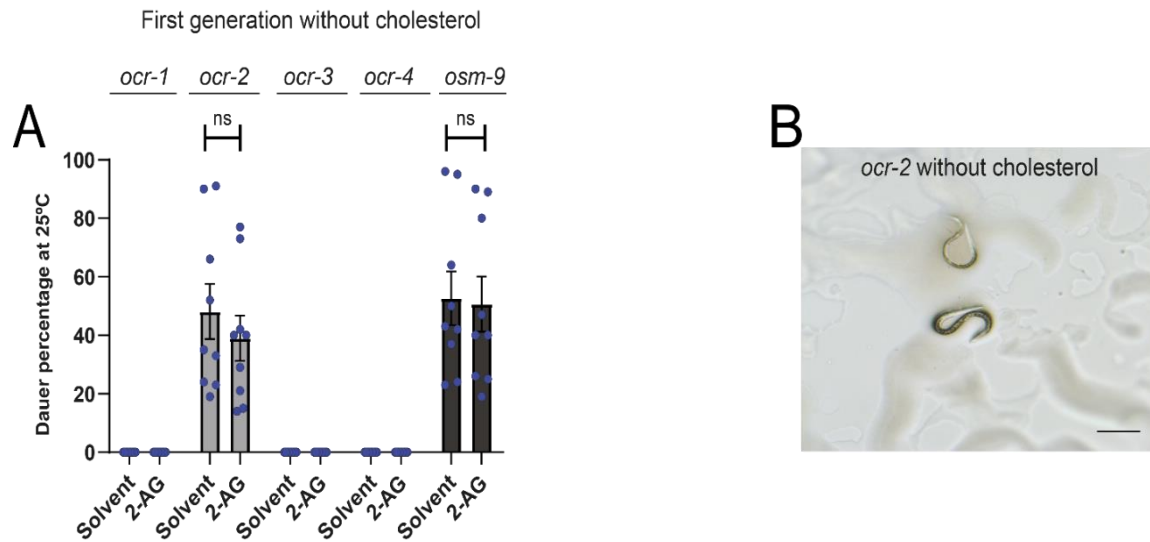

822

823 **Fig 3. *ocr-2* and *osm-9* are required for 2-AG-dependent cholesterol mobilization.** (A)  
824 Worms were grown in media with 0  $\mu\text{g}/\text{ml}$  of cholesterol during one generation at 25  $^{\circ}\text{C}$ .  
825 All values from  $n = 3$  independent experiments show as Mean  $\pm$  SEM. ns = not significant.  
826 (B) *ocr-2* undergoes dauer-like formation in the first generation when grown at 25  $^{\circ}\text{C}$  in  
827 cholesterol-free medium. The black straight line represents 0.25mm.

828

829

830

831

832

833

834

835

836

837

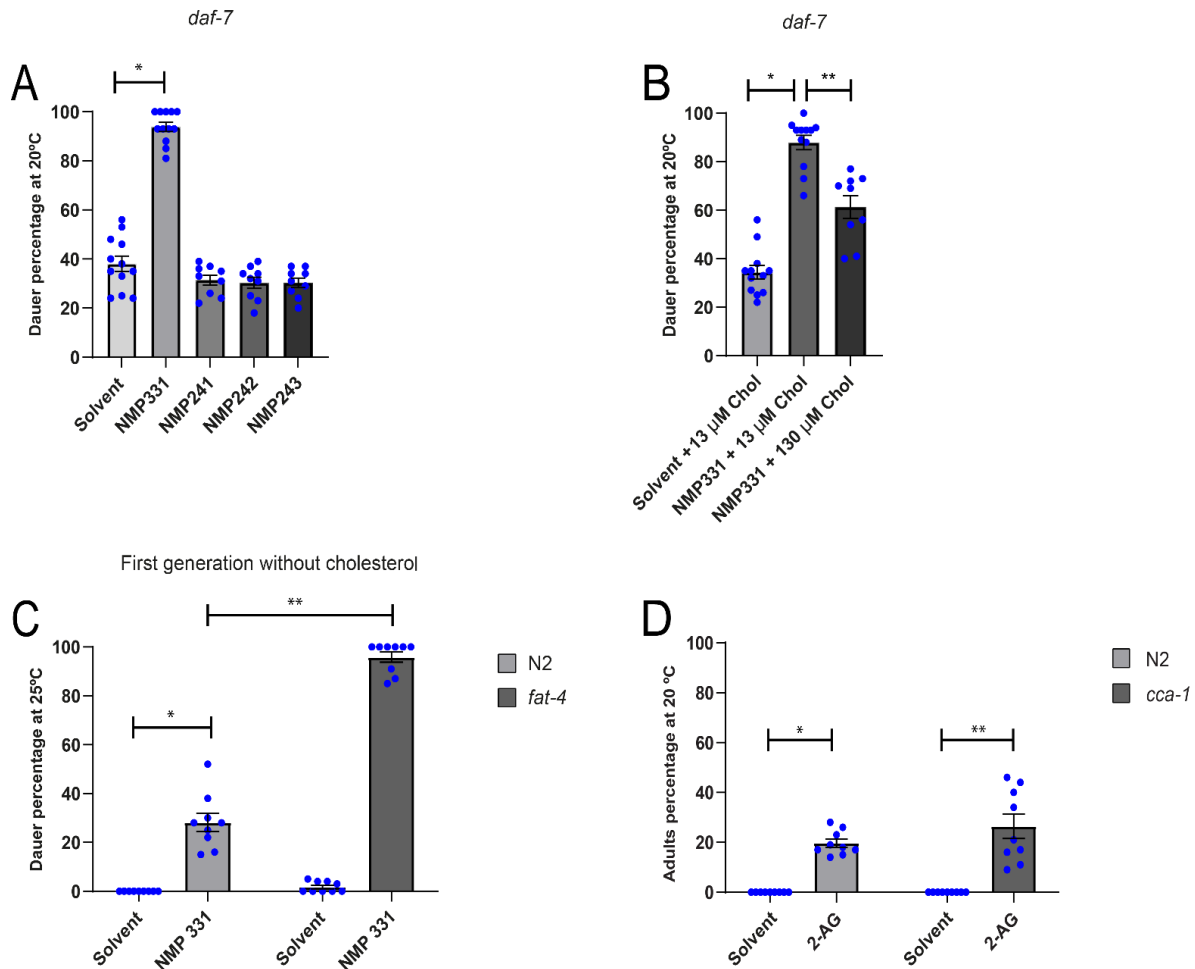

838

839 **Fig 4. The cannabinoid receptor antagonist NMP331 induces dauer formation.** (A) The  
 840 dauer arrest of *daf-7* worms is augmented by NMP331. All pairwise multiple comparison  
 841 procedures (Holm-Sidak method), \* $p < 0.001$ . All values from  $n \geq 3$  independent  
 842 experiments are shown as Mean  $\pm$  SEM. (B) Dauer arrest induced by NMP331 can be  
 843 rescued by high cholesterol diet. All Pairwise Multiple Comparison Procedures (Holm-  
 844 Sidak method), \* $p < 0.001$ . \*\* $p < 0.001$ . All values from  $n \geq 3$  independent experiments  
 845 show as Mean  $\pm$  SEM. (C) N2 and *fat-4* animals undergo a dauer arrest induced by 331  
 846 in the first generation when grown in cholesterol free medium. Mann-Whitney rank sum  
 847 test, \* $p < 0.001$ . \*\* $p < 0.005$ . All values from  $n = 3$  independent experiments are show  
 848 as Mean  $\pm$  SEM. (D) The 2-AG mediated suppression of larval arrest of N2, grown by two  
 849 generations in medium devoid of cholesterol, is independent of CCA-1. Mann-Whitney  
 850 rank sum test, \* $p < 0.001$ . t-test, \*\* $p < 0.001$ . All values from  $n = 3$  independent  
 851 experiments show as Mean  $\pm$  SEM. N2 is the *C. elegans* wild-type strain.

852

853

854



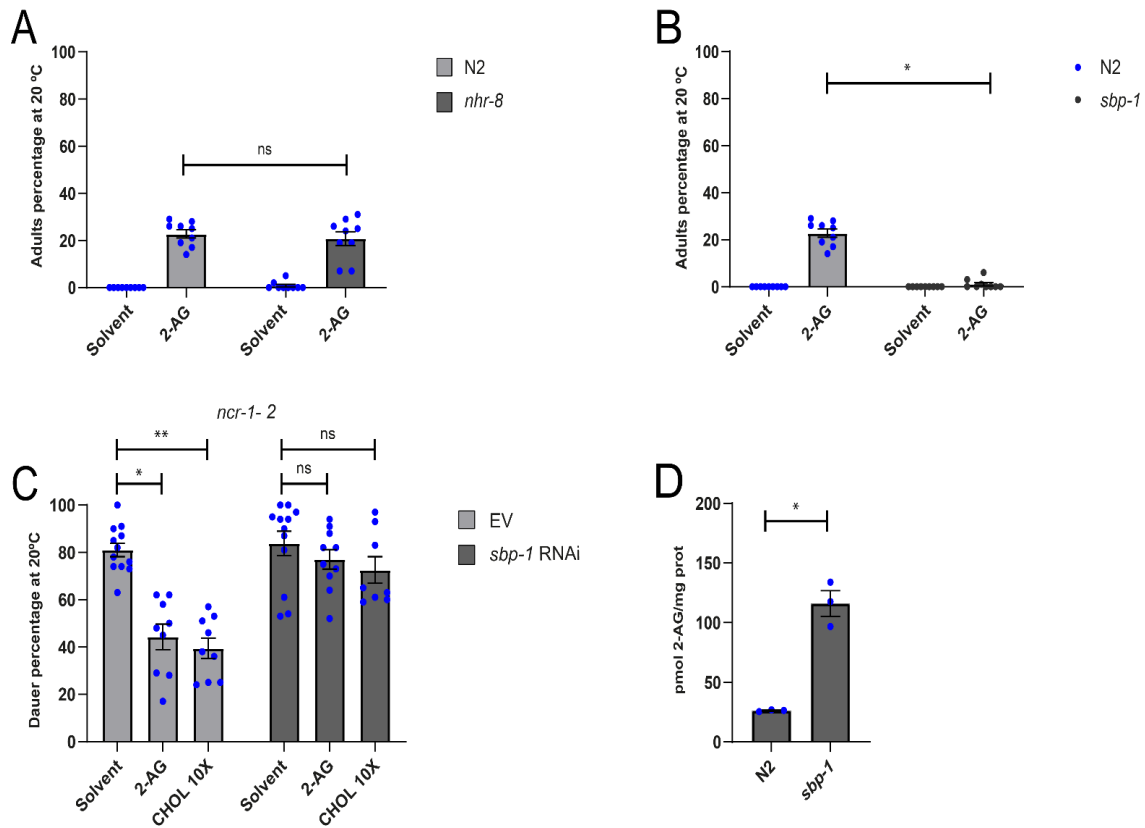

855

856

857 **Fig 5. SBP-1 is required for 2-AG modulation of cholesterol mobilization.** (A) 2-AG rescue  
858 the larval arrest of *nhr-8* worms grown two generations under 0 µg/ul of cholesterol at 20  
859 °C. All values from n = 3 independent experiments show as Mean ± SEM. ns = not significant.  
860 (B) 2-AG is unable to rescue the larval arrest of *sbp-1* grown two generations under 0 µg/ml  
861 of cholesterol at 20 °C. All Pairwise Multiple Comparison Procedures (Dunn's Method), \*p  
862 < 0.001. All values from n = 3 independent experiments are show as Mean ± SEM. (C) 2-AG  
863 is unable to suppress dauer formation of a *ncr-1-2* strain exposed to *sbp-1* RNAi. Kruskal-  
864 Wallis One-way analysis of variance on ranks, \*p < 0.001, \*\*p < 0.001. All values from n ≥ 3  
865 independent experiments are show as Mean ± SEM. ns = not significant. (D) 2-AG levels are  
866 elevated in *sbp-1* animals. t-test, \*p < 0.005. All values from n = 3 independent experiments  
867 are show as Mean ± SEM. N2 is the *C. elegans* wild-type strain.

868

869

870

871

872

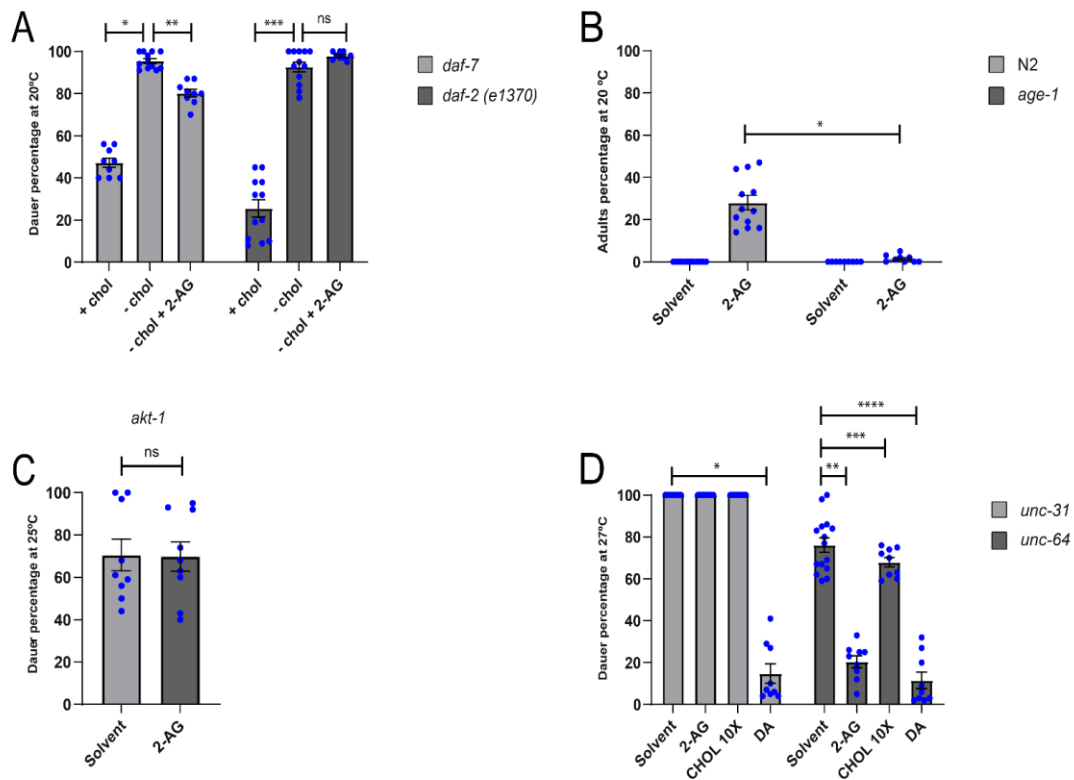

873

874

875 **Fig 6. DAF-2 and UNC-31 are required for 2-AG-dependent cholesterol mobilization.** (A)  
 876 *daf-7* and *daf-2(e1370)* were grown at 20 °C either on cholesterol or in a sterol-free media  
 877 during one generation. When indicated the media was supplemented with either  
 878 cholesterol 13 μM or 2-AG 50 μM. All Pairwise Multiple Comparison Procedures (Dunn's  
 879 Method), \*p < 0.05. \*\*p < 0.05. \*\*\*p < 0.05. All values from n ≥ 3 independent  
 880 experiments show as Mean ± SEM. ns = not significant. (B) N2 and *age-1* were grown for  
 881 two generations in media with 0 μg/ml cholesterol at 20°C. Mann-Whitney rank sum test,  
 882 \*p < 0.001. All values from n ≥ 3 independent experiments show as Mean ± SEM. (C) *akt-*  
 883 *1* was grown in media with 0 μg/ml cholesterol during one generation at 25 °C. All values  
 884 from n = 3 independent experiments show as Mean ± SEM. ns = not significant. (D) 2-AG  
 885 is unable rescue the *daf-c* phenotype of *unc-31* grown at 27 °C. All Pairwise Multiple  
 886 Comparison Procedures (Dunn's Method), \*p < 0.05. All Pairwise Multiple Comparison  
 887 Procedures (Holm-Sidak method), \*\*p < 0.05. \*\*\*p < 0.05. \*\*\*\*p < 0.05. All values from  
 888 n ≥ 3 independent experiments show as Mean ± SEM. N2 is the *C. elegans* wild-type strain.

889

890

891

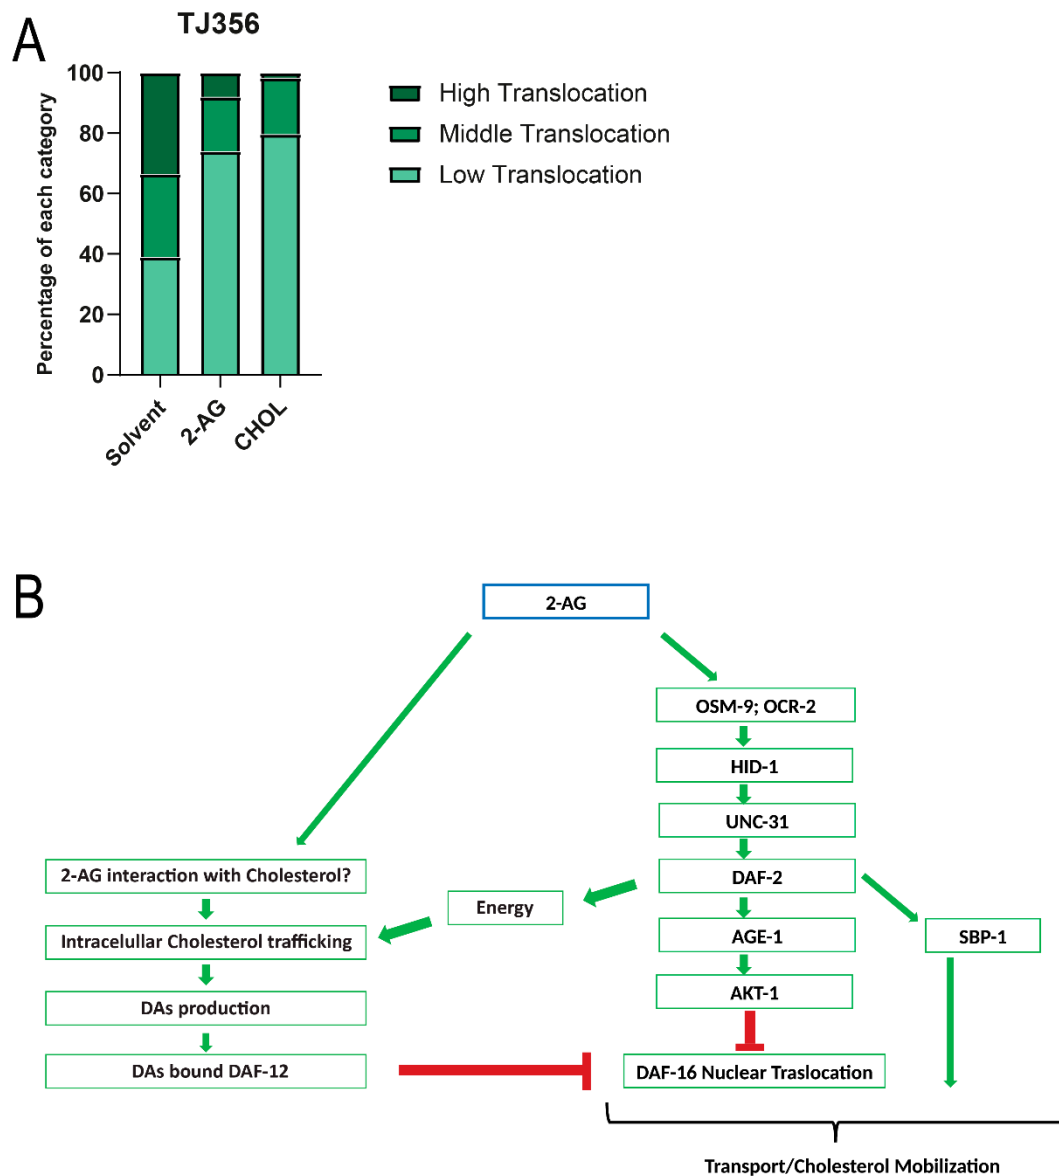

892

893 **Fig 7. 2-AG signaling inhibits nuclear translocation of DAF-16 induced by cholesterol**  
 894 **depletion.** (A) Nuclear translocation of DAF-16::GFP of worms grown under normal  
 895 cholesterol concentration (CHOL) and after cholesterol depletion for two generations  
 896 in the absence (solvent) or presence of 2-AG. 69 individual worms were analyzed for  
 897 the solvent condition, 66 for 2-AG and 64 for CHOL. (B) Working model of 2-AG  
 898 dependent mobilization of cholesterol. Under interaction of 2-AG with an unknown  
 899 target in sensory neurons, multiple signaling mechanisms are likely to converge on  
 900 activation of the IIS pathway and inhibition of DAF-16/FOXO. Signaling through the DAF-  
 901 2 insulin receptor has several functions and could be involved in modulation of the  
 902 intracellular traffic of cholesterol. The interaction of SBP-1 with the IIS pathway remains  
 903 to be established, but is likely that such interaction is essential for 2-AG-dependent  
 904 mobilization of cholesterol.

905

## Supporting information captions

907 **S1 Fig. TPH-1 is not required for 2-AG-dependent cholesterol mobilization.** (A) N2 and *tph-1* were  
908 grown for two generations in media with 0  $\mu\text{g}/\text{ml}$  cholesterol at 20°C. Mann-Whitney rank sum test,  
909 \* $p < 0.001$ . t-test, \*\* $p < 0.001$ . All values from  $n = 3$  independent experiments show as Mean  $\pm$  SEM.  
910 N2 is the *C. elegans* wild-type strain.

911 **S2 Fig. 2-AG did not elicit current in Xenopus oocytes expressing OSM-9 and OCR-2 channels.** (A)  
912 Representative traces of responses (above) and temperature (below) in *Xenopus oocytes* injected  
913 with cRNAs encoding OSM-9, OCR-2, OSM-9/OCR-2. (B) Mean  $\pm$  SEM of heat evoked currents.  
914 Amplitudes were calculated by measuring the differences between the peak inward currents and  
915 baseline marked with dotted lines (\*\* $p = 0.0001$ ,  $n \geq 5$  per group, ANOVA followed by a  
916 Bonferroni's multi-comparison test). (C) Representative traces of responses to 100 $\mu\text{M}$  2-AG either  
917 at room temperature (grey traces) or during a temperature ramp in oocytes expressing OSM-9, OCR-  
918 2 or OSM-9/OCR-2. (D) Mean  $\pm$  SEM of current amplitudes of responses to temperature, 100  $\mu\text{M}$  2-  
919 AG and temperature plus 100  $\mu\text{M}$  2-AG in oocytes injected with either OSM-9, OCR-2 or OSM-  
920 9/OCR-2 (\*\*\*\*  $p < 0.0001$ ,  $n \geq 3$  oocytes per group, two-way ANOVA followed by a Bonferroni multi-  
921 comparison test).

922 **S3 Fig. ASH calcium levels are not affected by 2-AG.** Calcium imaging traces of animals expressing  
923 GCaMP6 in the ASH (xuEx1978 [Psra-6::Gcamp6(f), Psra-6::DsRed]) during exposure to 2-AG.  
924 Average responses for all animals (A) are indicated by the dark blue line and the shaded area  
925 represents SEM. The same results are shown as individual traces for each animal (B). The dark grey  
926 bars indicate 4 second exposure to buffer containing 100mM 2-AG.

927 **S4 Fig. NMP331 induce a dauer-like formation in N2 starved for sterols and enhances dauer**  
928 **formation in *daf-7* mutants which can be overcome by 2-AG supplementation.** (A) N2 exhibit a  
929 dauer-like phenotype when is exposed to 1  $\mu\text{M}$  NMP31 in a sterol-free medium at 25 °C during one  
930 generation. The black straight line represents 0.25mm. (B) 2-AG antagonizes the effect of 1  $\mu\text{M}$  of  
931 NMP331 in a *daf-7* worm at 20 °C. All pairwise multiple comparison procedures (Holm-Sidak  
932 method), \* $p < 0.001$ . All values from  $n = 3$  independent experiments show as Mean  $\pm$  SEM.

933 **S5 Fig. Mobilization of cholesterol by 2-AG is independent of the *daf-7* pathway.** (A). *Daf-4* was  
934 grown at 20°C while *daf-14* and *daf-8* were grown at 25 °C under normal dietary cholesterol (13  
935  $\mu\text{M}$ ). t-test, \* $p < 0.001$ . \*\* $p < 0.001$ . \*\*\* $p < 0.002$ . All values from  $n = 3$  independent experiments  
936 show as Mean  $\pm$  SEM. (B) NMP331 does not enhance the *daf-c* phenotype of *daf-2* mutants. Mann-  
937 Whitney rank sum test, \* $p < 0.001$ . All values from  $n \geq 3$  independent experiments show as Mean  $\pm$   
938 SEM. ns = not significant.

939 **S6 Fig. Mobilization of cholesterol by 2-AG is dependent of *hid-1*.** (A) *Hid-1* is required for 2-AG  
940 dependent mobilization of cholesterol. Worms were grown at 27 °C under normal dietary  
941 cholesterol. All pairwise multiple comparison procedures (Holm-Sidak method), \* $p < 0.05$ . All values  
942 from  $n = 3$  independent experiments show as Mean  $\pm$  SEM. ns = not significant. (B) *HID-1* expression  
943 in the neurons in a *hid-1* background restores the 2-AG-dependent mobilization of cholesterol.  
944 Worms were grown at 27 °C under normal dietary cholesterol. Mann-Whitney rank sum test, \* $p <$   
945 0.001. All values from  $n \geq 3$  independent experiments show as Mean  $\pm$  SEM. ns = not significant.

946 **S7 Fig. DAF-16::GFP nuclear translocation groups classification.** Translocation categories were  
947 placed into 3 classes as the picture shows. Animals which exhibited DAF-16::GFP nuclear  
948 accumulation between 0-10% of total DAF-16::GFP were classified as Low Translocation (LowT), 30-  
949 50%, as Middle Translocation (MiddleT) and 70-90%, High Translocation (HighT). All animals shown  
950 are in a L2 larva stage.

951 **S8 Fig. *sbp-1* RNAi increases the *daf-c* phenotype of *daf-2*.** *daf-2* was grown in 13  $\mu$ M cholesterol  
952 at 20°C . Mann-Whitney rank sum test, \* $p < 0.005$ . All values from  $n = 3$  independent experiments  
953 show as Mean  $\pm$  SEM.

954 **S1 Table. Orthologues of CB1/2 grown for two generations in the absence of cholesterol arrest as**  
955 **L2-like larvae.**

956 **S2 Table. RNAi enhancer screen on *daf-7 (e1372)* worms.** For details see text.

957

958

959

960

961

962

963
